# Supplementary material
Source: PubMed Central journal article supplement (PMC9411261)
Supplement: mmc1.pdf [file mmc1.pdf]

# THE LANCET

## Infectious Diseases

### Supplementary appendix

This appendix formed part of the original submission and has been peer reviewed. We post it as supplied by the authors.

Supplement to: Perico N, Cortinovis M, Suter F, Remuzzi G. Home as the new frontier for the treatment of COVID-19: the case for anti-inflammatory agents. *Lancet Infect Dis* 2022; published online Aug 25. [https://doi.org/10.1016/S1473-3099\(22\)00449-2](https://doi.org/10.1016/S1473-3099(22)00449-2).

**SUPPLEMENTARY MATERIAL**

**Table S1. Studies that examined non-steroidal anti-inflammatory drugs for COVID-19 treatment in the general population.**

| <b>Study</b>         | <b>Exposure</b> | <b>Timing of exposure</b>                                                          | <b>Patient population</b>                                                            | <b>Age (years)</b>                                                              | <b>Male (%)</b> | <b>Primary Outcome</b>                                                                  | <b>Exposure group</b> | <b>Control group</b> | <b>Between group difference, P value</b>                  |
|----------------------|-----------------|------------------------------------------------------------------------------------|--------------------------------------------------------------------------------------|---------------------------------------------------------------------------------|-----------------|-----------------------------------------------------------------------------------------|-----------------------|----------------------|-----------------------------------------------------------|
| Abu Esba et al. 2021 | Ibuprofen       | Acute use during infection                                                         | 503 COVID-19 patients                                                                | Ibuprofen users, 35 [27 to 44]; non-NSAID users, 36 [27 to 49]                  | 59.2%           | 30-day mortality                                                                        | 1/40 (2.5%)           | 11/357 (3.1%)        | Adjusted HR 0.63 (95% CI 0.07 to 5.44), P=0.676           |
| Drake et al. 2021    | NSAIDs          | Within two weeks before hospital admission                                         | 72,179 patients hospitalized with confirmed or highly suspected SARS-CoV-2 infection | NSAID users, 70.1 (18.7); non-NSAID users, 70.2 (18.4)                          | 56.2%           | In-hospital mortality                                                                   | 1,273/4205 (30.3%)    | 1,324/4,205 (31.5%)  | Matched OR 0.95 (95% CI 0.84 to 1.07), P=0.35             |
| Jeong et al. 2021    | NSAIDs          | Within 7 days before hospitalization                                               | 1,824 patients hospitalized with COVID-19                                            | NSAID users, 54.1 (17.6); non-NSAID users, 47.8 (19.1)                          | 41.1%           | Combination of in-hospital death, ICU admission, mechanical ventilation use, and sepsis | 22/354 (6.2%)         | 52/1,470 (3.5%)      | IPTW OR 1.54 (95% CI 1.13 to 2.11)                        |
| Kragholm et al. 2020 | Ibuprofen       | Prescription claims from 1 January to 30 April 2020, and before COVID-19 diagnosis | 4,002 COVID-19 patients                                                              | Ibuprofen prescription, 58 [46 to 68]; no ibuprofen prescription, 57 [45 to 73] | 47.3%           | Combination of severe COVID-19, ICU admission, or death at 30 day                       | 42/264 (15.9%)        | 646/3,738 (17.3%)    | Standardized average RR 0.96 (95% CI 0.72 to 1.23)        |
| Lund et al. 2020     | NSAIDs          | Prescription up to 30 days before a positive SARS-CoV-2 test                       | 9,236 COVID-19 patients                                                              | NSAID users, 55 [43 to 64]; non-NSAID users, 49 [35 to 63]                      | 42.1%           | 30-day mortality                                                                        | 14/224                | 55/896               | RR 1.02 (95% CI 0.57 to 1.82), P=0.95                     |
| Rinott et al. 2020   | Ibuprofen       | From a week before diagnosis of COVID-19                                           | 403 COVID-19 patients                                                                | 45 [25 to 62]                                                                   | 54.6%           | Mortality                                                                               | 3/87 (3.4%)           | 9/316 (2.8%)         | Proportion difference 0.6%, 95% CI -4.3% to 5.5%, P>0.95  |
|                      |                 |                                                                                    |                                                                                      |                                                                                 |                 | Need for respiratory support                                                            | 9/87 (10.3%)          | 35/316 (11.1%)       | Proportion difference -0.8%, 95% CI -8.7% to 7.3%, P>0.95 |
| Wong et al. 2021     | NSAIDs          | Prescription within the previous 4 months                                          | 2,463,707 people prescribed NSAIDs in the past 3 years                               | Current NSAID users, 53 [42 to 64]; non-NSAID users, 49 [36 to 60]              | 42.7%           | COVID-19-related mortality                                                              | 220/536,423           | 612/1,927,284        | Adjusted HR 0.96 (95% CI 0.80 to 1.14)                    |

Data are mean (SD) or median [interquartile range]. CI, confidence interval; HR, hazard ratio; ICU, intensive care unit; IPTW, inverse probability of treatment weighted; NSAID, non-steroidal anti-inflammatory drugs; OR, odds ratio; RR, risk ratio.

Figure S1. Home as a new frontier for COVID-19.

## HOME WILL BE NEW FRONTIER

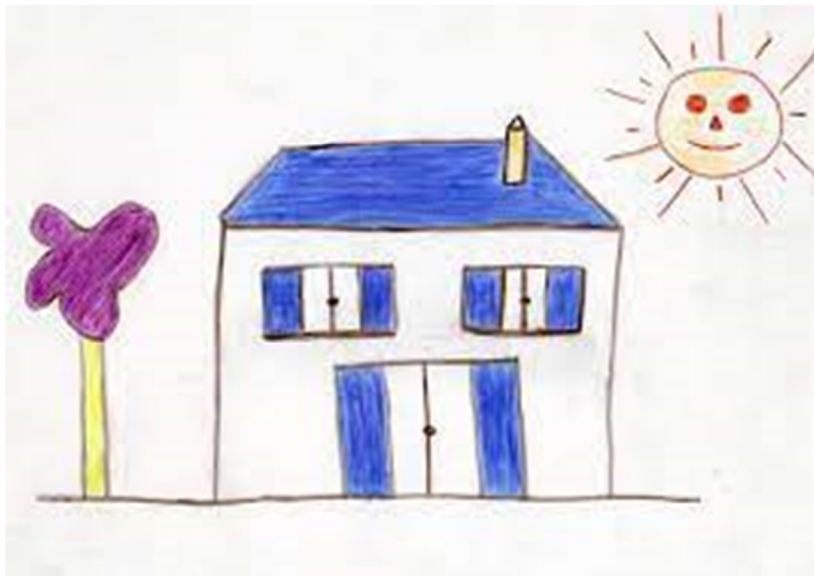

*Use the never ending capacity  
of home bed*

*This is the future*

*Ron Sabar - Sabar Health, Israel*

*Naim Mahroum - Sheba Medical Center, Israel*
